# Supplementary material
Source: PubMed Central journal article supplement (PMC4394284)
Supplement: pnas.201424850SI.pdf [file pnas.201424850SI.pdf]

# Supporting Information

Koh et al. 10.1073/pnas.1424850112

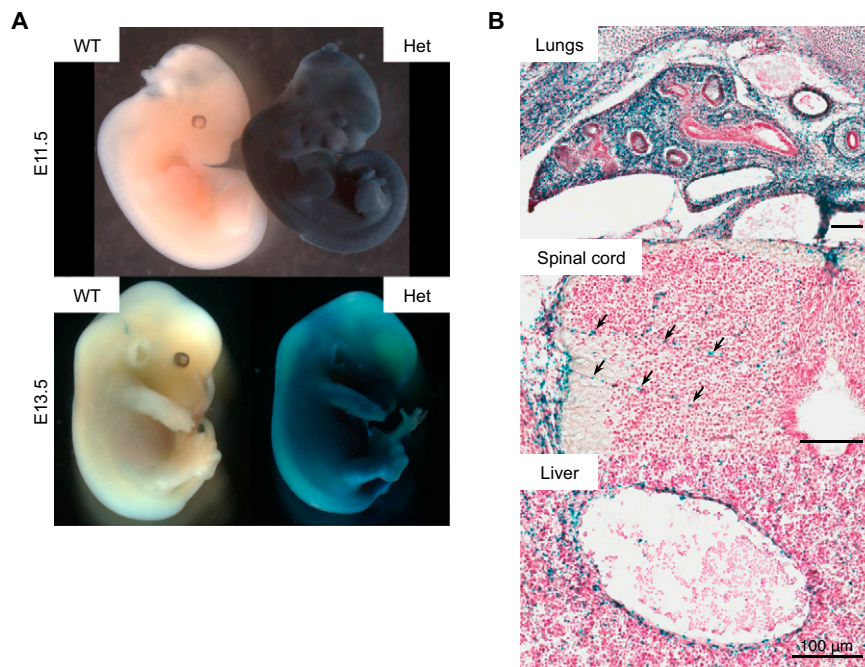

**Fig. S1.** *Chd1* is broadly expressed in the midgestational mouse embryo. Related to Fig. 1. (A) Whole-mount X-gal staining of *Chd1<sup>LacZ</sup>* embryos indicates a broad expression of *Chd1* in E11.5 and E13.5 embryos. (B) *Chd1<sup>LacZ</sup>* is expressed in the endothelium in various tissues in the E13.5 embryo, including in the lungs, intramedullary blood vessels in the spinal cord (black arrows), and the ductus venosus in the FL. (Scale bars, 100  $\mu$ m.)

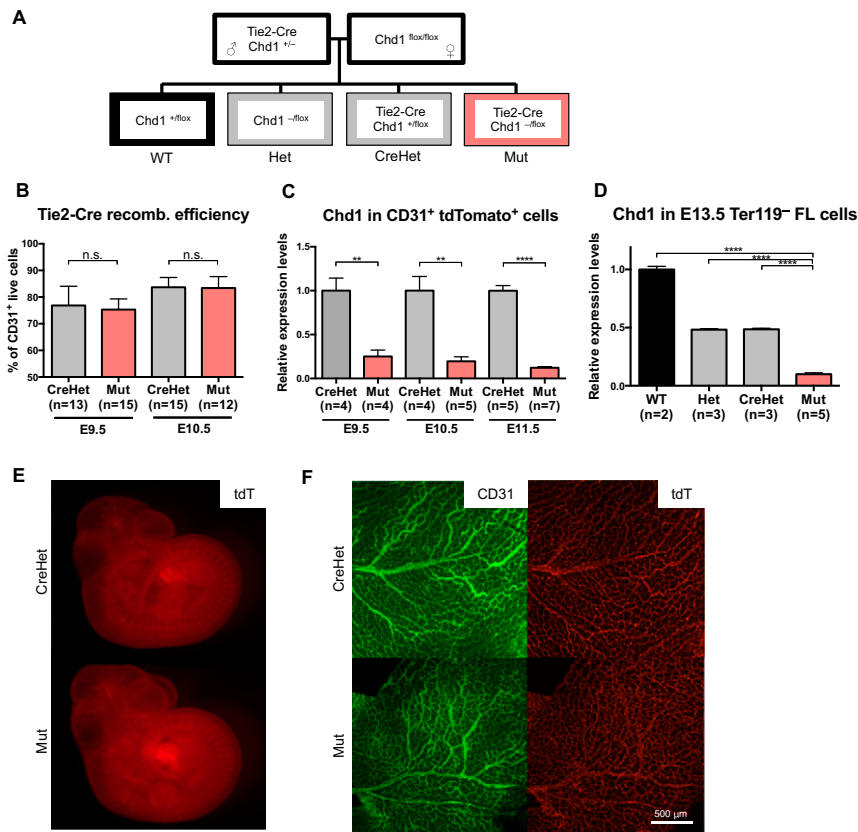

**Fig. S2.** High recombination efficiency and normal development of the vasculature in endothelial *Chd1* mutants. Related to Fig. 1. (A) Mouse breeding scheme used to generate *Tie2-Cre; Chd1<sup>-flox</sup>* mutant embryos. One in four embryos is expected to be of the mutant genotype. (B) *Tie2-Cre* is an efficient Cre deleter line, achieving 76% recombination in E9.5 CD31<sup>+</sup> cells and a significantly higher 84% at E10.5 ( $P < 0.0001$ ). Recombination efficiency is not significantly different between CreHet controls and mutants at either stage. (C and D) qRT-PCR analyses document the loss of *Chd1* expression in CD31<sup>+</sup> tdTomato<sup>+</sup> cells at E9.5, E10.5, and E11.5 and in E13.5 Ter119<sup>-</sup> FL cells. Error bars indicate SEM.  $**P \leq 0.01$ ;  $****P \leq 0.0001$ ; n.s., not significant. (E) tdTomato reporter marks the extensive Cre recombination within the embryonic vasculature in E11.5 embryos. (F) Whole-mount immunofluorescence of E10.5 CreHet and mutant yolk sacs shows a normal endothelial network.

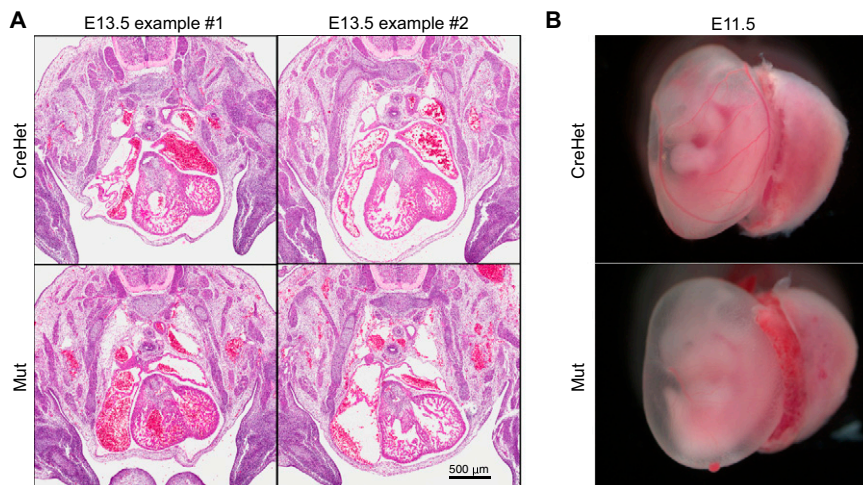

**Fig. S3.** Normal heart development but evidence of anemia in endothelial *Chd1* mutants. Related to Fig. 1. (A) Four-chamber heart view; transverse sections of CreHet and mutant hearts at E13.5 show no visible defects in heart chamber formation. (B) Yolk sacs of mutant E11.5 embryos appear anemic immediately after removal from the decidua.

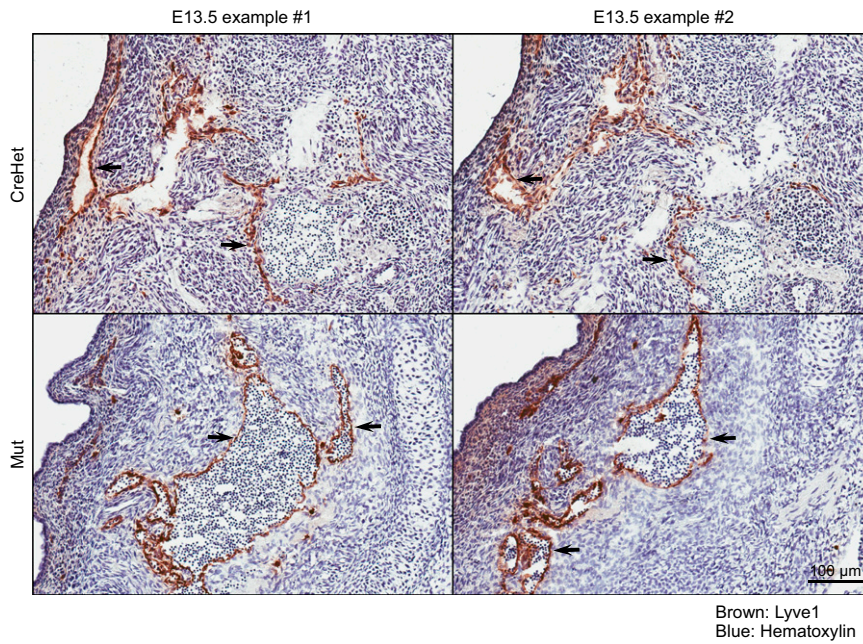

**Fig. S4.** Endothelial *Chd1* mutants display blood within lymphatic vessels. Related to Fig. 1. Immunohistochemical staining of Lyve1 marks lymphatic vessels (arrows) that appear collapsed or open but devoid of blood cells in CreHet control. These vessels are enlarged and filled with blood cells in endothelial *Chd1* mutants.

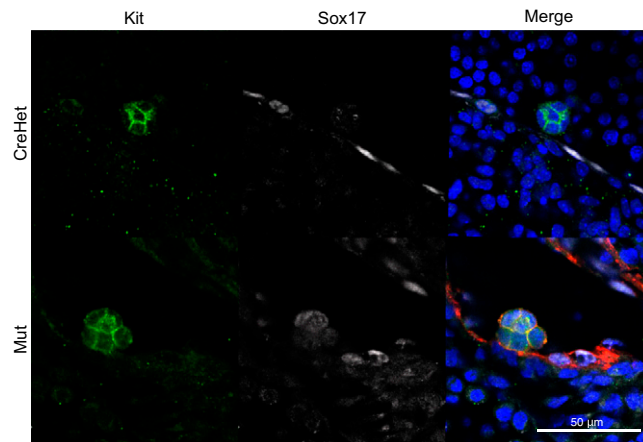

**Fig. S5.** *Chd1* mutant hemogenic clusters express Kit. Related to Fig. 4. Intraaortic clusters in the E10.5 mutant AGM show proper expression of Kit in *Chd1* mutants.

A

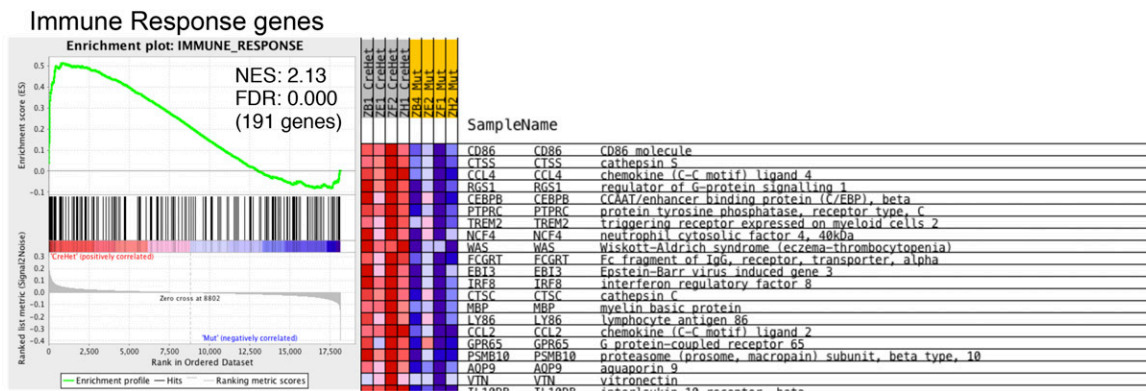

B

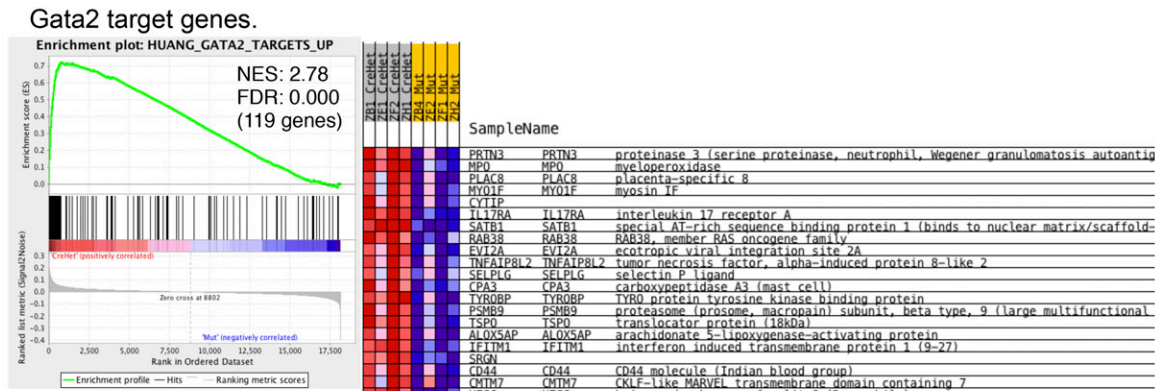

C

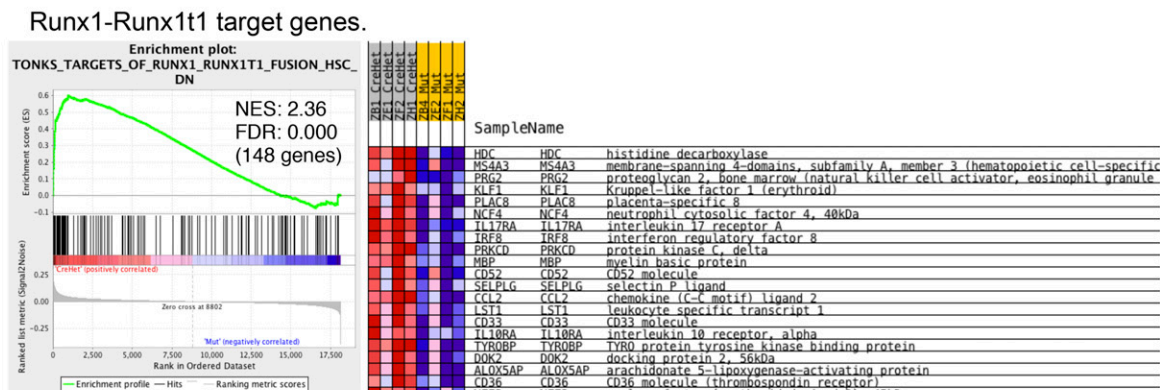

D

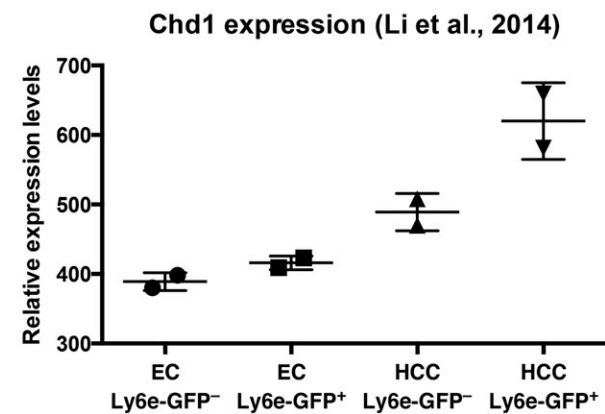

Fig. S6. Hematopoietic and growth genes are down-regulated in *Chd1* mutant endothelium. Related to Fig. 5. (A) GSEA for genes annotated with the GO term “immune response.” (B) GSEA for genes up-regulated in G1ME cells upon knockdown of *Gata2* by RNAi (1). (C) GSEA for genes down-regulated in normal hematopoietic progenitors by Runx1-Runx1t1 fusion (2). (D) Microarray data from Li et al. (3) show an elevated expression of *Chd1* in hematopoietic cluster cells (HCCs) compared with endothelial cells (ECs). FDR, false discovery rate; NES, net enrichment score. Error bars, SD.

- Huang Z, et al. (2009) GATA-2 reinforces megakaryocyte development in the absence of GATA-1. *Mol Cell Biol* 29(18):5168–5180.
- Tonks A, et al. (2007) Transcriptional dysregulation mediated by RUNX1-RUNX1T1 in normal human progenitor cells and in acute myeloid leukaemia. *Leukemia* 21(12):2495–2505.
- Li Y, et al. (2014) Inflammatory signaling regulates embryonic hematopoietic stem and progenitor cell production. *Genes Dev* 28(23):2597–2612.

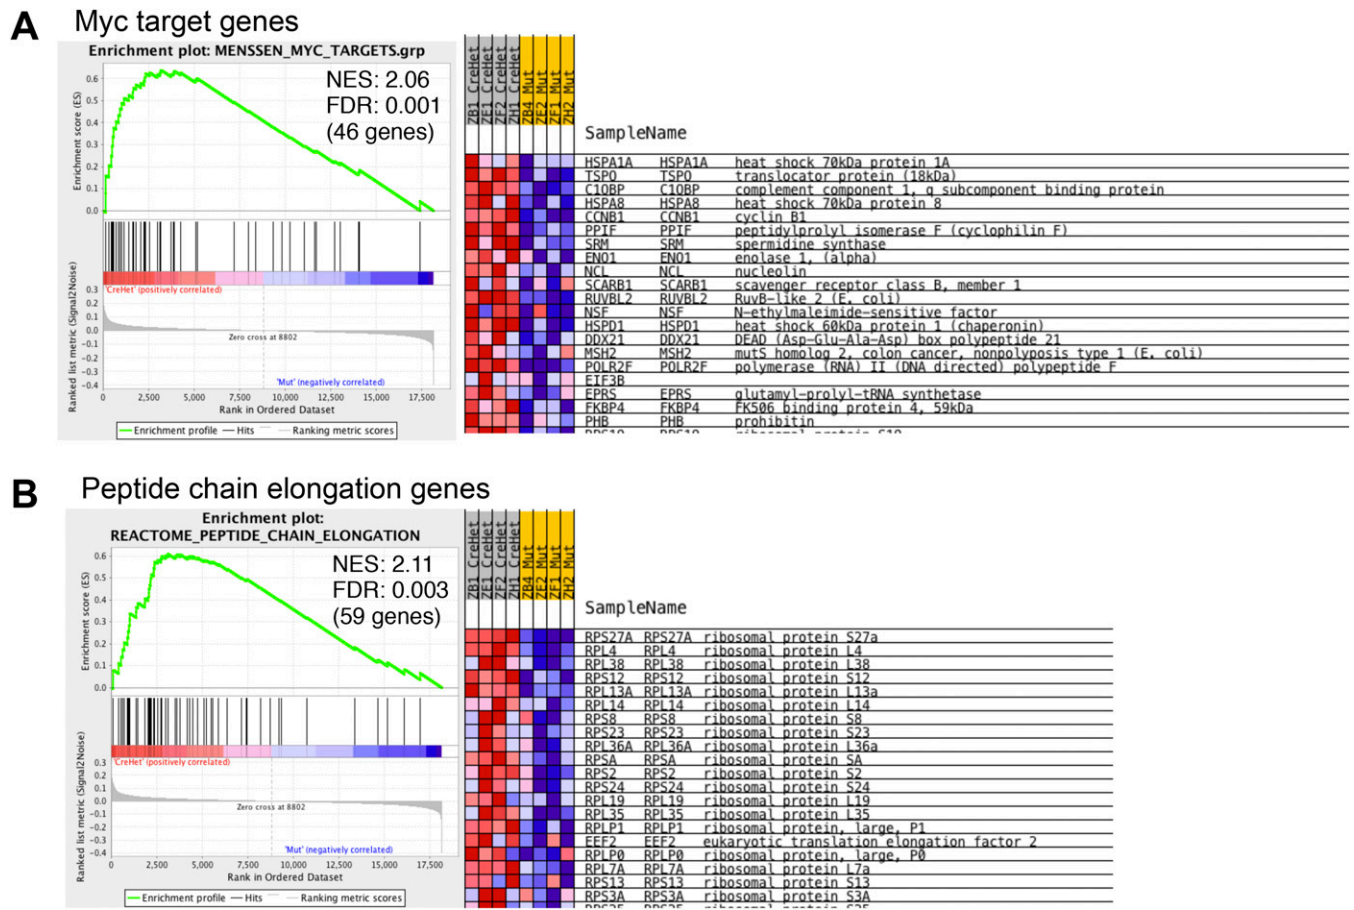

**Fig. S7.** Myc target genes and translation-related genes are down-regulated in *Chd1* mutant endothelium. Related to Fig. 6. (A) GSEA for genes up-regulated by adenoviral expression of Myc in human umbilical vein endothelial cells (HUVEC) cells (1). (B) GSEA for genes involved in peptide chain elongation as annotated in the Reactome Pathway Database ([www.reactome.org](http://www.reactome.org)).

- Menssen A, Hermeking H (2002) Characterization of the c-MYC-regulated transcriptome by SAGE: Identification and analysis of c-MYC target genes. *Proc Natl Acad Sci USA* 99(9):6274–6279.

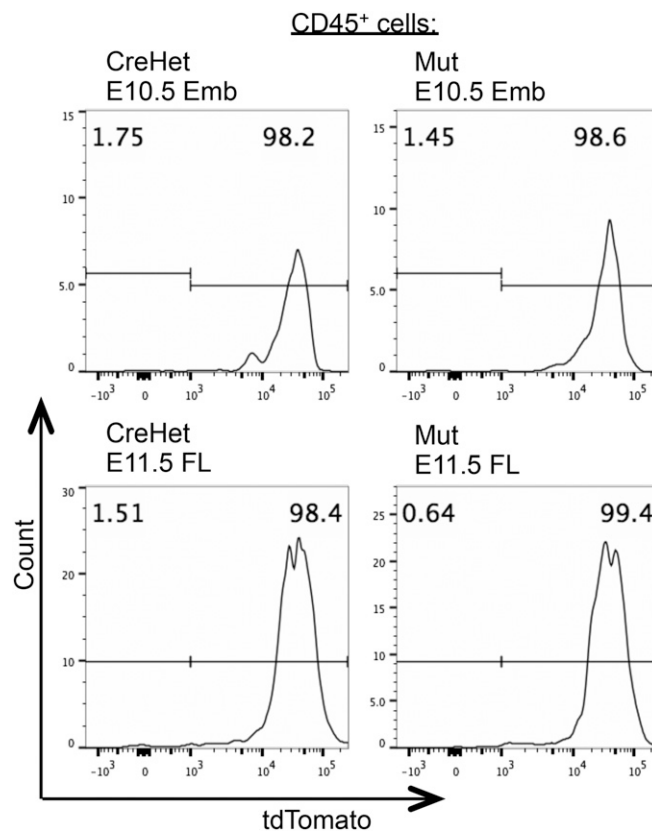

**Fig. S8.** Vav-Cre is very efficient in hematopoietic cells during development. Related to Fig. 7. Both CreHet controls (*Left*) and *Chd1* mutants (*Right*) generated using Vav-Cre have very high levels of recombination in CD45<sup>+</sup> hematopoietic cells in E10.5 whole embryo (*Top*) and E11.5 fetal liver (*Bottom*).

**Table S1. List of antibodies used in this study**

| Antibody              | Company        | Catalog no. | Host isotype          | Clone   | Conjugate   |
|-----------------------|----------------|-------------|-----------------------|---------|-------------|
| Anti-goat secondary   | Invitrogen     | A21447      | Donkey                | N.A.    | Alexa 647   |
| Anti-rabbit secondary | Invitrogen     | A21206      | Donkey                | N.A.    | Alexa 488   |
| Anti-rat secondary    | Invitrogen     | A21208      | Donkey                | N.A.    | Alexa 488   |
| Anti-rat secondary    | Invitrogen     | A21209      | Donkey                | N.A.    | Alexa 594   |
| CD117 (Kit)           | BioLegend      | 105812      | Rat IgG2b, $\kappa$   | 2B8     | APC         |
| CD117 (Kit)           | BD Pharmingen  | 553352      | Rat IgG2b, $\kappa$   | 2B8     | N.A.        |
| CD11b                 | BioLegend      | 101216      | Rat IgG2b, $\kappa$   | M1/70   | PE-Cy7      |
| CD19                  | BioLegend      | 115530      | Rat IgG2a, $\kappa$   | 6D5     | APC-Cy7     |
| CD31 (PECAM-1)        | BioLegend      | 102506      | Rat IgG2a, $\kappa$   | MEC13.3 | FITC        |
| CD31 (PECAM-1)        | BioLegend      | 102418      | Rat IgG2a, $\kappa$   | 390     | PE-Cy7      |
| CD31 (PECAM-1)        | BD Pharmingen  | 553370      | Rat IgG2a, $\kappa$   | MEC13.3 | N.A.        |
| CD4                   | BioLegend      | 100548      | Rat IgG2a, $\kappa$   | RM4-5   | BV605       |
| CD45 (LCA)            | BioLegend      | 103116      | Rat IgG2b, k          | 30-F11  | APC-Cy7     |
| CD45 (LCA)            | BioLegend      | 103122      | Rat IgG2b, k          | 30-F11  | Alexa 488   |
| CD45 (LCA)            | BioLegend      | 103114      | Rat IgG2b, k          | 30-F11  | PE-Cy7      |
| CD45 (LCA)            | BioLegend      | 103132      | Rat IgG2b, $\kappa$   | 30-F11  | PerCP-Cy5.5 |
| CD8                   | BioLegend      | 100733      | Rat IgG2a, $\kappa$   | 53-6.7  | PerCP-Cy5.5 |
| Cleaved caspase 3     | Cell Signaling | 9661        | Rabbit                | Asp175  | N.A.        |
| Ly-6A/E (Sca-1)       | BioLegend      | 108108      | Rat IgG2a, $\kappa$   | D7      | PE          |
| Ly-6G (Gr-1)          | BD Biosciences | 553127      | Rat IgG2b, $\kappa$   | RB6-8C5 | FITC        |
| NK1.1                 | BioLegend      | 108708      | Mouse IgG2a, $\kappa$ | PK136   | PE          |
| Runx1, 2, 3           | Abcam          | Ab92336     | Rabbit IgG            | EPR3099 | N.A.        |
| Sox17                 | R&D Systems    | AF1924      | Goat IgG              | Q9H612  | N.A.        |
| TCR $\beta$           | BioLegend      | 109212      | Armenian hamster IgG  | H57-597 | APC         |
| TER-119               | BioLegend      | 116228      | Rat IgG2b, $\kappa$   | TER-119 | PerCP-Cy5.5 |
| TER-119               | BioLegend      | 116208      | Rat IgG2b, $\kappa$   | TER-119 | PE          |

N.A., not applicable.

**Table S2. List of qRT-PCR primers used in this study**

| Gene                        | F/R | Sequence, 5'-3'                | Notes                                       |
|-----------------------------|-----|--------------------------------|---------------------------------------------|
| Ubb                         | F   | GCGGTTTGTGCTTTCATCAC           | Housekeeping for mRNA detection             |
|                             | R   | GGCAAAGATCAGCCTCTGCT           |                                             |
| L7                          | F   | AGCGGATTGCCTTGACAGA            | Housekeeping for mRNA detection             |
|                             | R   | AACTTGAAGGGCCACAGGAA           |                                             |
| GAPDH                       | F   | AGGTCGGTGTGAACGGATTTG          | Housekeeping for mRNA detection             |
|                             | R   | TGTAGACCATGTAGTTGAGGTCA        |                                             |
| Fabpi-200                   | F   | TGGACAGGACTGGACCTCTGCTTTCCTAGA | Housekeeping for genomic DNA detection      |
|                             | R   | TAGAGCTTTGCCACATCACAGGTCATTGAG |                                             |
| Fabpi-500                   | F   | CCTCCGGAGAGCAGCGATTAAGTGTCTG   | Housekeeping for genomic DNA detection      |
|                             | R   | TAGAGCTTTGCCACATCACAGGTCATTGAG |                                             |
| Chd1-flox allele            | F   | CGGAACCGAAGTTCCTATTCCGAAGTTCCT | Detection of intact <i>Chd1</i> flox allele |
|                             | R   | CCGCCTACTGCGACTATAGAGATATCAACC |                                             |
| Chd1 exon15-16              | F   | CAAGGAGCTTGAGCCATTTT           | Detection of <i>Chd1</i> mRNA levels        |
|                             | R   | TGGTGGTTTAATGAGGTAGCAA         |                                             |
| $\zeta$ -Globin             | F   | TGGATTCTGTGTGGGACTAAGGC        | Globin primers (1)                          |
|                             | R   | GGGCTTGGTGGGACTGTAAGG          |                                             |
| $\alpha 1/\alpha 2$ -Globin | F   | GCACAACCCAGCCCCAGAAT           |                                             |
|                             | R   | ACACGCCCTTGGAGCAGTTC           |                                             |
| $\epsilon\gamma$ -Globin    | F   | CCAGACTTGCCATCATGGTGA          |                                             |
|                             | R   | TCACCACCAACCTCTTCAACAT         |                                             |
| $\beta$ H1-Globin           | F   | GGACAGGTCTTCAGCCTCTTGA         |                                             |
|                             | R   | CAGATGCTTGTGATAGCTGCCT         |                                             |
| $\beta 1$ -Globin           | F   | CACCGAAGCCTGATTCCGTAGA         |                                             |
|                             | R   | GAAGCAAATGTGAGGAGCAACTGA       |                                             |
| $\beta 2$ -Globin           | F   | TGGTTGCATCTCTGAAGCCTCAC        |                                             |
|                             | R   | CTGCCACTCTGTCCTCTCTGA          |                                             |

F, forward; R, reverse.

1. Kingsley PD, et al. (2006) "Maturation" globin switching in primary primitive erythroid cells. *Blood* 107(4):1665–1672.

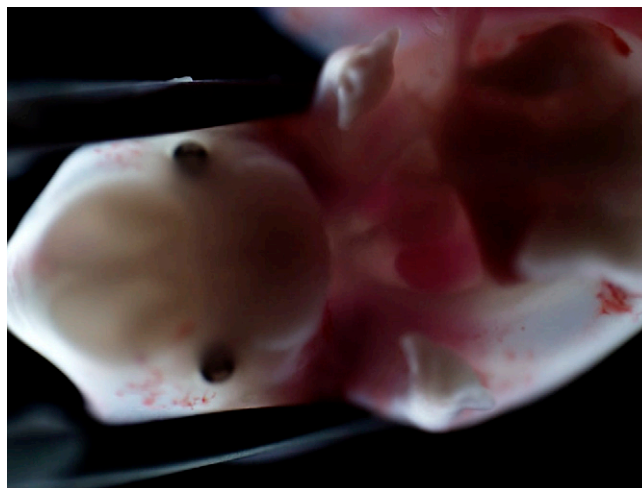

**Movie S1.** Related to Fig. 1. Mutant E13.5 embryo displays beating heart and blood flow within embryonic and umbilical vessels despite severe anemia.

[Movie S1](#)

## Other Supporting Information Files

[Dataset S1 \(TXT\)](#)
